# Supplementary material for: Extracellular Vesicles Derived from Mesenchymal Stromal Cells Delivered during Hypothermic Oxygenated Machine Perfusion Repair Ischemic/Reperfusion Damage of Kidneys from Extended Criteria Donors
Source: MDPI journal article supplement (doi:10.3390/biology11030350), 2022-02-22
Supplement: s1 [file s1]

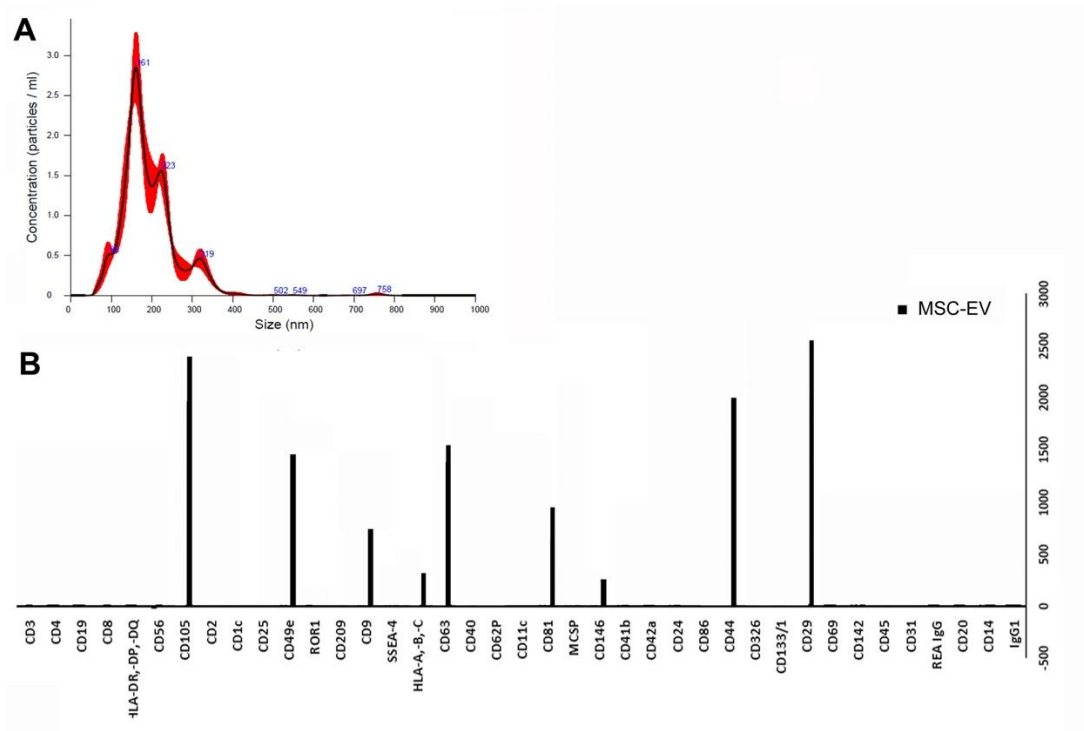

**Figure S1.** Characterization of EVs. (A) Representative graphs of nanoparticle tracking analysis showing size distribution of EVs. (B) Multiplex bead-based flow cytometry assay was used to detect EV surface signature. The graph shows a quantification of the median APC fluorescence values for all bead populations after background correction (medium control values subtracted from measured EVs values) of a representative EV preparation.
